# Supplementary material for: A bipartite iron-dependent transcriptional regulation of the tryptophan salvage pathway in Chlamydia trachomatis
Source: eLife journal article supplement (doi:10.7554/elife.42295), 2019-04-02
Supplement: supp [file elife-42295-supp-v1.zip]

Archive with 27 entries (27 files):
- elife_poa_e42295_Figure_2_Source_data_file_1.xlsx
- elife_poa_e42295_Figure_1_Source_data_file_1.xlsx
- elife_poa_e42295_Figure_5_figure_supplement_1.pdf
- elife_poa_e42295_Supplementary_file_5.xlsx
- elife_poa_e42295_Figure_5_Source_data_file_1.xlsx
- elife_poa_e42295_Supplementary_file_3.docx
- elife_poa_e42295_Figure_7_Source_data_file_1.xlsx
- elife_poa_e42295_Figure_4_figure_supplement_1.pdf
- elife_poa_e42295_Figure_8_figure_supplement_1.pdf
- elife_poa_e42295_Source_code_file_1.pdf
- elife_poa_e42295_Source_code_file_2.pdf
- elife_poa_e42295_Figure_6_figure_supplement_2.pdf
- elife_poa_e42295_Figure_4_figure_supplement_2.pdf
- elife_poa_e42295_Supplementary_file_1.xlsx
- elife_poa_e42295_Supplementary_file_6.xlsx
- elife_poa_e42295_Supplementary_file_4.docx
- elife_poa_e42295_Supplementary_file_2.xlsx
- elife_poa_e42295_Figure_7_figure_supplement_1.pdf
- elife_poa_e42295_Figure_1_figure_supplement_1.pdf
- elife_poa_e42295_Figure_5_figure_supplement_2.pdf
- elife_poa_e42295_Figure_6_figure_supplement_4.pdf
- elife_poa_e42295_Source_code_file_3.pdf
- elife_poa_e42295_Figure_6_figure_supplement_1.tif
- elife_poa_e42295_Figure_3_Source_data_file_1.xlsx
- elife_poa_e42295_Figure_4B_Source_data_file_1.xlsx
- elife_poa_e42295_Figure_6_figure_supplement_3.pdf
- elife_poa_e42295_Transparent_Reporting_File.pdf
