# Supplementary material for: A bipartite iron-dependent transcriptional regulation of the tryptophan salvage pathway in Chlamydia trachomatis
Source: eLife journal article supplement (doi:10.7554/elife.42295), 2019-04-02
Supplement: supp [file elife-42295-supp-v1.zip › elife_poa_e42295_Figure_1_Source_data_file_1.xlsx]

## Sheet: Figure 1
Figure 1 Source Data
ahpC gDNA				Euo				OmcB
	Replicate				Replicate				Replicate
Sample (transcript copies/[genome copy/ng total gDNA])	2018-06-04	2018-08-15	2019-02-27	Sample (transcript copies/[genome copy/ng total gDNA])	2018-06-04	2018-08-15	2019-02-27	Sample (transcript copies/[genome copy/ng total gDNA])	2018-06-04	2018-08-15	2019-02-28
12UT1	795.173	1376.02	1218.94	12UT1	3.79734	3.88507	6.54265	12UT1	0.73324	0.147934	0.1698
12UT2	677.005	1775.54	1347.3	12UT2	11.4499	7.45999	12.464	12UT2	0.481558	0.218122	0.24073
18UT1	9598.75	21602.6	9728.75	18UT1	5.51358	2.11766	6.00561	18UT1	2.06768	0.532788	0.702772
18UT2	7032.65	16659.7	10073.9	18UT2	5.85609	1.77463	2.89874	18UT2	1.24445	0.376201	0.723687
12+6BPD1	4055.75	14802.7	2217.94	12+6BPD1	7.2591	1.76953	4.75672	12+6BPD1	2.00374	0.865792	2.5768
12+6BPD2	3202.89	9428.07	7348.27	12+6BPD2	8.48657	2.4037	5.4829	12+6BPD2	2.46925	1.18128	1.79962
24UT1	108145	77755.9	57694.6	24UT1	1.09475	1.20554	1.64792	24UT1	10.7047	4.50897	8.78917
24UT2	80245.4	72560.1	34199.7	24UT2	0.257558	1.17569	1.29771	24UT2	5.27013	5.85514	5.58954
12+12BPD1	13532.9	20610.5	12186.3	12+12BPD1	0.909061	2.74748	2.15838	12+12BPD1	22.7186	11.2302	7.74973
12+12BPD2	16199.5	21877.8	11999.2	12+12BPD2	1.81278	2.93835	3.96377	12+12BPD2	17.6243	10.8817	17.8962
				Aggregate Mean	4.03776	4.03776	4.03776	Aggregate Mean	4.91179	4.91179	4.91179
				Individual Mean	4.64368	2.74776	4.72184	Individual Mean	6.53177	3.57981	4.62381
				Batch Correction Factor	-0.605916	1.29	-0.68408	Batch Correction Factor	-1.61997	1.33198	0.287989
				Batch Corrected Values				Batch Corrected Values
				12UT1	3.19143	5.17506	5.85857	12UT1	-0.886733	1.47992	0.457789
				12UT2	10.844	8.74999	11.7799	12UT2	-1.13842	1.55011	0.528719
				18UT1	4.90767	3.40766	5.32153	18UT1	0.447711	1.86477	0.990761
				18UT2	5.25017	3.06463	2.21466	18UT2	-0.375522	1.70819	1.01168
				12+6BPD1	6.65318	3.05952	4.07264	12+6BPD1	0.383769	2.19778	2.86479
				12+6BPD2	7.88066	3.69369	4.79882	12+6BPD2	0.849281	2.51326	2.08761
				24UT1	0.488833	2.49553	0.963837	24UT1	9.08469	5.84095	9.07716
				24UT2	-0.348358	2.46569	0.613631	24UT2	3.65016	7.18713	5.87753
				12+12BPD1	0.303144	4.03748	1.4743	12+12BPD1	21.0987	12.5622	8.03771
				12+12BPD2	1.20686	4.22835	3.27969	12+12BPD2	16.0043	12.2136	18.1842
				Flooring Factor	1.34836			Flooring Factor	2.13842
				Floor Corrected Values				Floor Corrected Values
				12UT1	4.53978	6.52342	7.20693	12UT1	1.25168	3.61833	2.5962
				12UT2	12.1924	10.0983	13.1283	12UT2	1	3.68852	2.66713
				18UT1	6.25603	4.75602	6.66989	18UT1	2.58613	4.00319	3.12918
				18UT2	6.59853	4.41299	3.56302	18UT2	1.76289	3.8466	3.15009
				12+6BPD1	8.00154	4.40788	5.421	12+6BPD1	2.52218	4.33619	5.00321
				12+6BPD2	9.22901	5.04205	6.14718	12+6BPD2	2.9877	4.65168	4.22602
				24UT1	1.83719	3.84389	2.31219	24UT1	11.2231	7.97937	11.2156
				24UT2	1	3.81404	1.96199	24UT2	5.78857	9.32554	8.01594
				12+12BPD1	1.6515	5.38584	2.82266	12+12BPD1	23.2371	14.7006	10.1761
				12+12BPD2	2.55522	5.5767	4.62804	12+12BPD2	18.1428	14.3521	20.3226
				Mean Values for Individual Replicate				Mean Values for Individual Replicate
				12UT	8.36608	8.31088	10.1676	12UT	1.12584	3.65343	2.63167
				18UT	6.42728	4.5845	5.11645	18UT	2.17451	3.92489	3.13963
				6BPD	8.61528	4.72497	5.78409	6BPD	2.75494	4.49393	4.61461
				24UT	1.4186	3.82897	2.13709	24UT	8.50584	8.65245	9.61576
				12BPD	2.10336	5.48127	3.72535	12BPD	20.6899	14.5263	15.2494
				SD Values for Individual Replicate				SD Values for Individual Replicate
				12UT	5.4112	2.52785	4.18702	12UT	0.177966	0.0496301	0.0501553
				18UT	0.242185	0.24256	2.19689	18UT	0.582114	0.110724	0.014789
				6BPD	0.867956	0.448428	0.513492	6BPD	0.329167	0.223082	0.549551
				24UT	0.591984	0.0211041	0.247633	24UT	3.84279	0.95189	2.26248
				12BPD	0.639026	0.134963	1.2766	12BPD	3.60223	0.246471	7.17465
					Total Mean	Total SD			Total Mean	Total SD
				12UT	8.94819	1.0564		12UT	2.47031	1.2715
				18UT	5.37608	0.948423		18UT	3.07968	0.876731
				6BPD	6.37478	2.0113		6BPD	3.9545	1.0406
				24UT	2.46155	1.23751		24UT	8.92468	0.602961
				12BPD	3.76999	1.6894		12BPD	16.8219	3.36928
Figure 1 - Figure Supplement 1 Source Data
ahpC gDNA				Euo				OmcB
	Replicate				Replicate				Replicate
Sample (transcript copies/[genome copy/ng total gDNA])	2017-09-20	2018-01-09	2018-01-24	Sample (transcript copies/[genome copy/ng total gDNA])	2018-01-09	2018-01-24	2019-02-28	Sample (transcript copies/[genome copy/ng total gDNA])	2018-01-09	2018-01-24	2019-02-28
12UT1	1359.26	1258.02	845.957	12UT1	5.61237	25.8094	9.05868	12UT1	0.222028	0.709063	0.484614
12UT2	1629.57	1191.74	1341.13	12UT2	7.50279	26.4423	10.3023	12UT2	0.36525	1.01785	0.348418
18+W1	15220.2	6074.45	9871.64	18+W1	4.89728	11.34	4.08485	18+W1	1.89051	2.36356	0.899351
18+W2	9790.02	9359.88	9632.49	18+W2	7.43261	10.1672	5.12789	18+W2	1.7414	1.84807	0.609082
18-W1	10388.4	6649.07	5456.08	18-W1	4.62649	29.5779	6.33809	18-W1	1.64686	3.07776	0.949378
18-W2	14344	3244.67	2934.25	18-W2	5.76675	17.2378	7.44504	18-W2	1.13001	2.63458	0.983571
24+W1	31472.3	67934.1	94890.3	24+W1	0.429718	1.50764	0.659918	24+W1	2.73238	10.4872	5.68317
24+W2	50026.5	71746	73179.1	24+W2	0.399936	2.56143	0.730291	24+W2	3.15744	6.98789	6.35945
24-W1	22117.2	28477.3	26080.2	24-W1	0.99168	5.08951	3.06513	24-W1	2.08074	2.72764	3.73205
24-W2	18417.2	20096.9	27674.4	24-W2	1.06743	3.05012	4.33617	24-W2	1.98167	2.04862	2.82653
				Aggregate Mean	7.42196	7.42196	7.42196	Aggregate Mean	2.45754	2.45754	2.45754
				Individual Mean	3.8727	13.2783	5.11484	Individual Mean	1.69483	3.39023	2.28756
				Batch Correction Factor	3.54925	-5.85638	2.30712	Batch Correction Factor	0.762711	-0.932689	0.169978
				Batch Corrected Values				Batch Corrected Values
				12UT1	9.16162	19.953	11.3658	12UT1	0.984739	-0.223626	0.654591
				12UT2	11.052	20.5859	12.6094	12UT2	1.12796	0.0851581	0.518396
				18+W1	8.44653	5.48364	6.39197	18+W1	2.65322	1.43087	1.06933
				18+W2	10.9819	4.31086	7.43501	18+W2	2.50411	0.915381	0.779059
				18-W1	8.17574	23.7215	8.64521	18-W1	2.40957	2.14507	1.11936
				18-W2	9.316	11.3815	9.75216	18-W2	1.89272	1.70189	1.15355
				24+W1	3.97897	-4.34874	2.96704	24+W1	3.4951	9.55456	5.85315
				24+W2	3.94919	-3.29495	3.03741	24+W2	3.92015	6.0552	6.52942
				24-W1	4.54093	-0.766866	5.37225	24-W1	2.84345	1.79495	3.90203
				24-W2	4.61668	-2.80626	6.64329	24-W2	2.74438	1.11593	2.99651
				Flooring Factor	5.34874			Flooring Factor	1.22363
				Floor Corrected Values				Floor Corrected Values
				12UT1	14.5104	25.3017	16.7145	12UT1	2.20837	1	1.87822
				12UT2	16.4008	25.9347	17.9582	12UT2	2.35159	1.30878	1.74202
				18+W1	13.7953	10.8324	11.7407	18+W1	3.87684	2.6545	2.29296
				18+W2	16.3306	9.6596	12.7838	18+W2	3.72774	2.13901	2.00269
				18-W1	13.5245	29.0702	13.994	18-W1	3.63319	3.3687	2.34298
				18-W2	14.6647	16.7302	15.1009	18-W2	3.11634	2.92552	2.37717
				24+W1	9.32771	1	8.31578	24+W1	4.71872	10.7782	7.07678
				24+W2	9.29793	2.05379	8.38615	24+W2	5.14378	7.27883	7.75305
				24-W1	9.88967	4.58187	10.721	24-W1	4.06708	3.01858	5.12566
				24-W2	9.96542	2.54248	11.992	24-W2	3.96801	2.33956	4.22014
				Mean Values for Individual Replicate				Mean Values for Individual Replicate
				12UT	15.4556	25.6182	17.3364	12UT	2.27998	1.15439	1.81012
				18+W	15.0629	10.246	12.2622	18+W	3.80229	2.39675	2.14782
				18-W	14.0946	22.9002	14.5474	18-W	3.37477	3.14711	2.36008
				24+W	9.31282	1.5269	8.35096	24+W	4.93125	9.0285	7.41492
				24-W	9.92755	3.56218	11.3565	24-W	4.01754	2.67907	4.6729
				SD Values for Individual Replicate				SD Values for Individual Replicate
				12UT	1.33673	0.447553	0.879381	12UT	0.101273	0.218344	0.0963048
				18+W	1.79275	0.82928	0.737541	18+W	0.105433	0.364509	0.205252
				18-W	0.806283	8.72573	0.782729	18-W	0.365468	0.313376	0.024178
				24+W	0.0210594	0.745144	0.0497616	24+W	0.300561	2.47442	0.478197
				24-W	0.0535619	1.44207	0.898762	24-W	0.0700516	0.48014	0.640299
					Total Mean	Total SD			Total Mean	Total SD
				12UT	19.47	5.40687		12UT	1.74816	0.565344
				18+W	12.5237	2.4191		18+W	2.78229	0.892074
				18-W	17.1807	4.95837		18-W	2.96065	0.532423
				24+W	6.39689	4.24487		24+W	7.12489	2.06397
				24-W	8.28208	4.14953		24-W	3.78983	1.01623
