# Supplementary material for: A bipartite iron-dependent transcriptional regulation of the tryptophan salvage pathway in Chlamydia trachomatis
Source: eLife journal article supplement (doi:10.7554/elife.42295), 2019-04-02
Supplement: supp [file elife-42295-supp-v1.zip › elife_poa_e42295_Figure_2_Source_data_file_1.xlsx]

## Sheet: Figure 2
Figure 2 Source Data
YtgA				AhpC				DevB				DnaB
	Replicate				Replicate				Replicate				Replicate
Sample (transcript copies/[genome copy/ng total gDNA])	2018-12-16	2018-06-04	2018-08-15	Sample (transcript copies/[genome copy/ng total gDNA])	2018-12-16	2018-06-04	2018-08-15	Sample (transcript copies/[genome copy/ng total gDNA])	2018-12-16	2018-06-04	2018-08-15	Sample (transcript copies/[genome copy/ng total gDNA])	2018-12-16	2018-06-04	2018-08-15
12UT1	72.3502	59.2382	70.3084	12UT1	22.7521	7.64074	6.66894	12UT1	15.3775	3.87326	3.02917	12UT1	5.33822	15.7437	2.13193
12UT2	77.752	185.481	87.4818	12UT2	26.8574	24.5402	12.4215	12UT2	13.5575	10.9761	4.59036	12UT2	5.92096	21.6496	2.33591
18UT1	42.5458	90.1805	52.6053	18UT1	10.183	8.78532	3.39991	18UT1	5.54406	4.38442	1.88334	18UT1	2.66534	10.0303	1.71322
18UT2	38.6667	106.342	38.9074	18UT2	12.5752	9.62369	2.71702	18UT2	6.90366	4.15445	1.38397	18UT2	2.68688	15.8002	1.61669
12+6BPD1	80.118	175.933	64.7241	12+6BPD1	22.1971	23.656	4.36941	12+6BPD1	13.0567	6.10732	1.77476	12+6BPD1	6.25443	13.8282	2.24239
12+6BPD2	66.9142	155.962	101.482	12+6BPD2	22.2054	22.7593	6.2673	12+6BPD2	11.803	8.93189	2.3371	12+6BPD2	5.2224	12.0947	2.4406
Aggregate Mean	87.0552	87.0552	87.0552	Aggregate Mean	13.8678	13.8678	13.8678	Aggregate Mean	6.64826	6.64826	6.64826	Aggregate Mean	7.20643	7.20643	7.20643
Individual Mean	63.0578	128.856	69.2515	Individual Mean	19.4617	16.1675	5.97402	Individual Mean	11.0404	6.40457	2.49978	Individual Mean	4.68137	14.8578	2.08012
Batch Correction Factor	23.9974	-41.801	17.8036	Batch Correction Factor	-5.59394	-2.29979	7.89373	Batch Correction Factor	-4.39216	0.243686	4.14847	Batch Correction Factor	2.52505	-7.65136	5.1263
Batch Corrected Values				Batch Corrected Values				Batch Corrected Values				Batch Corrected Values
12UT1	96.3475	17.4371	88.112	12UT1	17.1582	5.34095	14.5627	12UT1	10.9854	4.11695	7.17765	12UT1	7.86328	8.09231	7.25823
12UT2	101.749	143.68	105.285	12UT2	21.2634	22.2404	20.3153	12UT2	9.16533	11.2198	8.73884	12UT2	8.44601	13.9982	7.46221
18UT1	66.5432	48.3795	70.4089	18UT1	4.58909	6.48553	11.2936	18UT1	1.1519	4.6281	6.03181	18UT1	5.1904	2.37896	6.83952
18UT2	62.6641	64.5407	56.7111	18UT2	6.98129	7.3239	10.6107	18UT2	2.5115	4.39813	5.53244	18UT2	5.21194	8.14889	6.74299
12+6BPD1	104.115	134.132	82.5278	12+6BPD1	16.6031	21.3562	12.2631	12+6BPD1	8.66457	6.35101	5.92324	12+6BPD1	8.77949	6.17686	7.3687
12+6BPD2	90.9116	114.161	119.286	12+6BPD2	16.6114	20.4595	14.161	12+6BPD2	7.41087	9.17558	6.48557	12+6BPD2	7.74745	4.4433	7.5669
Flooring Factor	0			Flooring Factor	0			Flooring Factor	0			Flooring Factor	0
Floor Corrected Values				Floor Corrected Values				Floor Corrected Values				Floor Corrected Values
12UT1	96.3475	17.4371	88.112	12UT1	17.1582	5.34095	14.5627	12UT1	10.9854	4.11695	7.17765	12UT1	7.86328	8.09231	7.25823
12UT2	101.749	143.68	105.285	12UT2	21.2634	22.2404	20.3153	12UT2	9.16533	11.2198	8.73884	12UT2	8.44601	13.9982	7.46221
18UT1	66.5432	48.3795	70.4089	18UT1	4.58909	6.48553	11.2936	18UT1	1.1519	4.6281	6.03181	18UT1	5.1904	2.37896	6.83952
18UT2	62.6641	64.5407	56.7111	18UT2	6.98129	7.3239	10.6107	18UT2	2.5115	4.39813	5.53244	18UT2	5.21194	8.14889	6.74299
12+6BPD1	104.115	134.132	82.5278	12+6BPD1	16.6031	21.3562	12.2631	12+6BPD1	8.66457	6.35101	5.92324	12+6BPD1	8.77949	6.17686	7.3687
12+6BPD2	90.9116	114.161	119.286	12+6BPD2	16.6114	20.4595	14.161	12+6BPD2	7.41087	9.17558	6.48557	12+6BPD2	7.74745	4.4433	7.5669
Mean Values for Individual Replicate				Mean Values for Individual Replicate				Mean Values for Individual Replicate				Mean Values for Individual Replicate
12UT	99.0485	80.5588	96.6987	12UT	19.2108	13.7907	17.439	12UT	10.0754	7.66836	7.95824	12UT	8.15464	11.0453	7.36022
18UT	64.6036	56.4601	63.56	18UT	5.78519	6.90472	10.9522	18UT	1.8317	4.51312	5.78213	18UT	5.20117	5.26393	6.79126
6BPD	97.5135	124.147	100.907	6BPD	16.6073	20.9079	13.2121	6BPD	8.03772	7.76329	6.2044	6BPD	8.26347	5.31008	7.4678
SD Values for Individual Replicate				SD Values for Individual Replicate				SD Values for Individual Replicate				SD Values for Individual Replicate
12UT	3.81969	89.2675	12.1434	12UT	2.90282	11.9497	4.06769	12UT	1.28697	5.02246	1.10393	12UT	0.412056	4.17612	0.144235
18UT	2.74292	11.4277	9.68585	18UT	1.69154	0.592817	0.482882	18UT	0.961377	0.162613	0.35311	18UT	0.0152305	4.07995	0.0682581
6BPD	9.33645	14.122	25.9919	6BPD	0.00587412	0.634049	1.34201	6BPD	0.886497	1.99727	0.397633	6BPD	0.729759	1.22581	0.140153
	Total Mean	Total SD			Total Mean	Total SD			Total Mean	Total SD			Total Mean	Total SD
12UT	92.102	10.0655		12UT	16.8135	2.76368		12UT	8.56732	1.31401		12UT	8.85338	1.93935
18UT	61.5412	4.43123		18UT	7.8807	2.71825		18UT	4.04231	2.01686		18UT	5.75212	0.900469
6BPD	107.522	14.4967		6BPD	16.9091	3.85676		6BPD	7.33514	0.988811		6BPD	7.01378	1.52814
