# Supplementary material for: A bipartite iron-dependent transcriptional regulation of the tryptophan salvage pathway in Chlamydia trachomatis
Source: eLife journal article supplement (doi:10.7554/elife.42295), 2019-04-02
Supplement: supp [file elife-42295-supp-v1.zip › elife_poa_e42295_Figure_3_Source_data_file_1.xlsx]

## Sheet: Figure 3
Figure 3 Source Data
Figure 3B
trpR				trpB				trpA
	Replicate				Replicate				Replicate
Sample (transcript copies/[genome copy/ng total gDNA])	2018-01-09	2018-01-24	2019-02-28	Sample (transcript copies/[genome copy/ng total gDNA])	2018-01-09	2018-01-24	2019-02-28	Sample (transcript copies/[genome copy/ng total gDNA])	2018-01-09	2018-01-24	2019-02-28
12UT1	1.03127	2.13939	0.88782	12UT1	0.112179	0.378796	0.385383	12UT1	0.474683	0.704032	1.00565
12UT2	2.01427	3.11282	0.838136	12UT2	0.164684	0.389723	0.303527	12UT2	0.634313	1.14329	0.908841
18+W1	1.09044	0.839945	0.448704	18+W1	0.138119	0.14449	0.0991193	18+W1	0.597098	0.433906	0.37741
18+W2	0.708962	1.0006	0.348159	18+W2	0.38659	0.129852	0.170122	18+W2	0.629862	0.315763	0.254841
18-W1	255.466	254.608	65.316	18-W1	46.7166	85.1005	23.6947	18-W1	122.066	155.368	57.214
18-W2	159.11	226.318	105.042	18-W2	41.9244	59.6034	8.78287	18-W2	140.983	127.743	48.3241
Aggregate Mean	60.0178	60.0178	60.0178	Aggregate Mean	14.9236	14.9236	14.9236	Aggregate Mean	36.621	36.621	36.621
Individual Mean	69.9035	81.3366	28.8135	Individual Mean	14.9071	24.2911	5.57261	Individual Mean	44.2309	47.6181	18.0141
Batch Correction Factor	-9.88563	-21.3187	31.2043	Batch Correction Factor	0.0165118	-9.36751	9.351	Batch Correction Factor	-7.60984	-10.997	18.6069
Batch Corrected Values				Batch Corrected Values				Batch Corrected Values
12UT1	-8.85436	-19.1793	32.0922	12UT1	0.128691	-8.98871	9.73638	12UT1	-7.13515	-10.293	19.6125
12UT2	-7.87136	-18.2059	32.0425	12UT2	0.181195	-8.97779	9.65452	12UT2	-6.97552	-9.85376	19.5157
18+W1	-8.79519	-20.4788	31.6531	18+W1	0.154631	-9.22302	9.45012	18+W1	-7.01274	-10.5631	18.9843
18+W2	-9.17667	-20.3181	31.5525	18+W2	0.403102	-9.23766	9.52112	18+W2	-6.97997	-10.6813	18.8617
18-W1	245.581	233.29	96.5203	18-W1	46.7331	75.7329	33.0457	18-W1	114.456	144.371	75.8209
18-W2	149.224	205	136.247	18-W2	41.941	50.2359	18.1339	18-W2	133.374	116.746	66.931
Flooring Factor	21.4788			Flooring Factor	10.2377			Flooring Factor	11.6813
Floor Corrected Values				Floor Corrected Values				Floor Corrected Values
12UT1	12.6244	2.29945	53.5709	12UT1	10.3663	1.24894	19.974	12UT1	4.54613	1.38827	31.2938
12UT2	13.6074	3.27287	53.5213	12UT2	10.4189	1.25987	19.8922	12UT2	4.70576	1.82752	31.197
18+W1	12.6836	1	53.1318	18+W1	10.3923	1.01464	19.6878	18+W1	4.66854	1.11814	30.6656
18+W2	12.3021	1.16066	53.0313	18+W2	10.6408	1	19.7588	18+W2	4.70131	1	30.543
18-W1	267.059	254.768	117.999	18-W1	56.9707	85.9706	43.2833	18-W1	126.137	156.052	87.5021
18-W2	170.703	226.478	157.725	18-W2	52.1786	60.4735	28.3715	18-W2	145.055	128.427	78.6123
Mean Values for Individual Replicate				Mean Values for Individual Replicate				Mean Values for Individual Replicate
12UT	13.1159	2.78616	53.5461	12UT	10.3926	1.25441	19.9331	12UT	4.62594	1.6079	31.2454
18+W	12.4928	1.08033	53.0816	18+W	10.5165	1.00732	19.7233	18+W	4.68492	1.05907	30.6043
18-W	218.881	240.623	137.862	18-W	54.5747	73.2221	35.8274	18-W	135.596	142.24	83.0572
SD Values for Individual Replicate				SD Values for Individual Replicate				SD Values for Individual Replicate
12UT	0.695087	0.688314	0.0351318	12UT	0.0371263	0.00772648	0.0578808	12UT	0.112876	0.310599	0.0684517
18+W	0.269745	0.113603	0.0710963	18+W	0.175696	0.0103503	0.0502061	18+W	0.0231678	0.0835397	0.0866694
18-W	68.1344	20.004	28.0906	18-W	3.38854	18.0291	10.5442	18-W	13.3769	19.5338	6.28607
	Total Mean	Total SD			Total Mean	Total SD			Total Mean	Total SD
12UT	23.1494	26.8262		12UT	10.5267	9.34007		12UT	12.4931	16.3099
18+W	22.2182	27.3307		18+W	10.4157	9.35838		18+W	12.1161	16.1136
18-W	199.122	54.1551		18-W	54.5414	18.6973		18-W	120.298	32.4219
Figure 3C
TrpR				TrpB				TrpA
	Replicate				Replicate				Replicate
Sample (transcript copies/[genome copy/ng total gDNA])	2018-12-16	2018-06-04	2018-08-15	Sample (transcript copies/[genome copy/ng total gDNA])	2018-12-16	2018-06-04	2018-08-15	Sample (transcript copies/[genome copy/ng total gDNA])	2018-12-16	2018-06-04	2018-08-15
12UT1	5.53665	1.46049	0.912793	12UT1	0.59317	0.280497	0.324227	12UT1	1.58843	0.602703	0.828403
12UT2	5.43591	4.63216	1.58026	12UT2	0.660149	1.13677	0.827854	12UT2	1.62103	2.66667	1.17129
18UT1	1.80363	2.23832	0.469849	18UT1	0.210566	0.238427	0.250829	18UT1	0.603047	0.745176	0.290711
18UT2	2.75122	2.33836	0.79601	18UT2	0.277757	0.248036	0.212465	18UT2	0.73765	0.745188	0.275678
12+6BPD1	6.11973	6.34523	2.09034	12+6BPD1	1.76805	3.19547	1.50313	12+6BPD1	5.89232	5.31178	2.2086
12+6BPD2	5.60102	4.96641	1.57719	12+6BPD2	1.45164	2.3255	1.78634	12+6BPD2	5.24522	7.14383	1.65601
Aggregate Mean	3.14753	3.14753	3.14753	Aggregate Mean	0.960604	0.960604	0.960604	Aggregate Mean	2.18521	2.18521	2.18521
Individual Mean	4.54136	3.6635	1.23774	Individual Mean	0.826889	1.23745	0.817475	Individual Mean	2.61462	2.86922	1.07178
Batch Correction Factor	-1.39383	-0.515964	1.90979	Batch Correction Factor	0.133716	-0.276845	0.143129	Batch Correction Factor	-0.429409	-0.684016	1.11343
Batch Corrected Values				Batch Corrected Values				Batch Corrected Values
12UT1	4.14283	0.944529	2.82258	12UT1	0.726886	0.00365209	0.467356	12UT1	1.15902	-0.081313	1.94183
12UT2	4.04208	4.1162	3.49006	12UT2	0.793865	0.85992	0.970984	12UT2	1.19162	1.98265	2.28471
18UT1	0.409799	1.72236	2.37964	18UT1	0.344281	-0.0384184	0.393959	18UT1	0.173638	0.0611594	1.40414
18UT2	1.35739	1.82239	2.7058	18UT2	0.411473	-0.0288092	0.355595	18UT2	0.308241	0.0611721	1.3891
12+6BPD1	4.7259	5.82927	4.00013	12+6BPD1	1.90177	2.91863	1.64626	12+6BPD1	5.46291	4.62776	3.32203
12+6BPD2	4.20719	4.45045	3.48698	12+6BPD2	1.58535	2.04866	1.92947	12+6BPD2	4.81581	6.45981	2.76944
Flooring Factor	0.590201			Flooring Factor	1.03842			Flooring Factor	1.08131
Floor Corrected Values				Floor Corrected Values				Floor Corrected Values
12UT1	4.73303	1.53473	3.41279	12UT1	1.7653	1.04207	1.50577	12UT1	2.24034	1	3.02314
12UT2	4.63228	4.7064	4.08026	12UT2	1.83228	1.89834	2.0094	12UT2	2.27293	3.06397	3.36603
18UT1	1	2.31256	2.96984	18UT1	1.3827	1	1.43238	18UT1	1.25495	1.14247	2.48545
18UT2	1.94759	2.41259	3.296	18UT2	1.44989	1.00961	1.39401	18UT2	1.38955	1.14249	2.47042
12+6BPD1	5.31611	6.41947	4.59033	12+6BPD1	2.94018	3.95704	2.68468	12+6BPD1	6.54423	5.70908	4.40334
12+6BPD2	4.79739	5.04065	4.07718	12+6BPD2	2.62377	3.08707	2.96789	12+6BPD2	5.89712	7.54113	3.85075
Mean Values for Individual Replicate				Mean Values for Individual Replicate				Mean Values for Individual Replicate
12UT	4.68265	3.12057	3.74652	12UT	1.79879	1.4702	1.75759	12UT	2.25664	2.03198	3.19458
18UT	1.4738	2.36258	3.13292	18UT	1.4163	1.0048	1.4132	18UT	1.32225	1.14248	2.47793
6BPD	5.05675	5.73006	4.33376	6BPD	2.78198	3.52206	2.82628	6BPD	6.22068	6.6251	4.12705
SD Values for Individual Replicate				SD Values for Individual Replicate				SD Values for Individual Replicate
12UT	0.0712406	2.24271	0.471974	12UT	0.0473616	0.605473	0.356118	12UT	0.0230491	1.45945	0.242457
18UT	0.670048	0.0707348	0.230631	18UT	0.0475113	0.00679471	0.0271276	18UT	0.0951791	9.00165e-06	0.01063
6BPD	0.366787	0.974973	0.362853	6BPD	0.223737	0.615163	0.200263	6BPD	0.457572	1.29546	0.390742
	Total Mean	Total SD			Total Mean	Total SD			Total Mean	Total SD
12UT	3.84991	0.78616		12UT	1.67553	0.179006		12UT	2.4944	0.616693
18UT	2.3231	0.830267		18UT	1.2781	0.236684		18UT	1.64755	0.724725
6BPD	5.04019	0.698297		6BPD	3.04344	0.415087		6BPD	5.65761	1.34084
