# Supplementary material for: A bipartite iron-dependent transcriptional regulation of the tryptophan salvage pathway in Chlamydia trachomatis
Source: eLife journal article supplement (doi:10.7554/elife.42295), 2019-04-02
Supplement: supp [file elife-42295-supp-v1.zip › elife_poa_e42295_Figure_4B_Source_data_file_1.xlsx]

## Sheet: Figure 4
Figure 4B Source Data
Sample	Ratio
Twelve	0.662
Twelve	1.52
Twelve	0.572
Eighteen	1.07
Eighteen	0.706
Eighteen	0.998
Bpdl	2.03
Bpdl	2.31
Bpdl	1.84
Trp	0.564
Trp	1.4
Trp	0.638
