# Supplementary material for: A bipartite iron-dependent transcriptional regulation of the tryptophan salvage pathway in Chlamydia trachomatis
Source: eLife journal article supplement (doi:10.7554/elife.42295), 2019-04-02
Supplement: supp [file elife-42295-supp-v1.zip › elife_poa_e42295_Figure_5_figure_supplement_1.pdf]

|             |                                                               |     |
|-------------|---------------------------------------------------------------|-----|
| A/HAR-13    | TCTTCTTTTGTAAAAATACAAATAAGATTAAAGTATTTGTATGCATGCGTTGTTAATGAA  | 60  |
| B/Jali20/OT | TCTTCTTTTGTAAAAATACAAATAAGATTAAAGTATTTGTATGCATGCGTTGTTAATGAA  | 60  |
| D/UW-3/CX   | TCTTCTTTTGTAAAAATACAAATAAGATTAAAGTATTTGTATGCATGCGTTGTTAATGAA  | 60  |
| L2 (434/Bu) | TCTTCTTTTGTAAAAATACAAATAAGATTGAAAGTATTTGTATGCACGCGTTGTTAATGAA | 60  |
|             | *****                                                         |     |
| A/HAR-13    | CAAAATATTCTGTTTTAGCAGTTTTGGTACATAAGTATAGCTGCAGCATGCCATGCAAATC | 120 |
| B/Jali20/OT | CAAAATATTCTGTTTTAGCAGTTTTGGTACATAAGTATAGCTGCAGCATGCCATGCAAATC | 120 |
| D/UW-3/CX   | CAAAATATTCTGTTTTAGCAGTTTTGGTACATAAGTATAGCTGCAGCATGCCATGCAAATC | 120 |
| L2 (434/Bu) | CAAAATATTCTGTTTTAGCAGTTTTGGTACGTAGTATAGCTGCAGCATGCCATGCAAATC  | 120 |
|             | *****                                                         |     |
| A/HAR-13    | AGCTTTTCAAGCTGATTGCTTCCAAGATATTCAAAAATTCATCCTCTTACAGCGTGCCTG  | 180 |
| B/Jali20/OT | AGCTTTTCAAGCTGATTGCTTCCAAGATATTCAAAAATTCATCCTCTTACAGCGTGCCTG  | 180 |
| D/UW-3/CX   | AGCTTTTCAAGCTGATTGCTTCCAAGATATTCAAAAATTCATCCTCTTACAGCGTGCCTG  | 180 |
| L2 (434/Bu) | AGCTTTTCAAGCTGATTGCTTCCAAGATATTCAAAAATTCATCCTCTTACAGCGTGCCTG  | 180 |
|             | *****                                                         |     |
| A/HAR-13    | GCTTCTCTTTTGAAGCTGGCGCTTATCTACTTGGCGATAGGCCATAATTAAGAAGCCTTTT | 240 |
| B/Jali20/OT | GCTTCTCTTTTGAAGCTGGCGCTTATCTACTTGGCGATAGGCCATAATTAAGAAGCCTTTT | 240 |
| D/UW-3/CX   | GCTTCTCTTTTGAAGCTGGCGCTTATCTACTTGGCGATAGGCCATAATTAAGAAGCCTTTT | 240 |
| L2 (434/Bu) | GCTTCTCTTTTGAAGCTGGCGCTTATCTACTTGGCGATAGGCCATAATTAAGAAGCCTTTT | 240 |
|             | *****                                                         |     |
| A/HAR-13    | ATTTGATTAAAGAGATGTTCTTATAGAAGTAAGAGCGTCTTTTTTGCAGGATTATTCTG   | 300 |
| B/Jali20/OT | ATTTGATTAAAGAGATGTTCTTATAGAAGTAAGAGCGTCTTTTTTGCAGGATTATTCTG   | 300 |
| D/UW-3/CX   | ATTTGATTAAAGAGATGTTCTTATAGAAGTAAGAGCGTCTTTTTTGCAGGATTATTCTG   | 300 |
| L2 (434/Bu) | ATTTGATTAAAGAGATGTTCTTATAGAAGTAAGAGCGTCTTTTTTGCAGGATTATTCTG   | 300 |
|             | *****                                                         |     |
| A/HAR-13    | TCGCCAGTTTTTTCTATGATTTTAACACTATAAATTTATGGAGAAAAAG             | 348 |
| B/Jali20/OT | TCGCCAGTTTTTTCTATGATTTTAACACTATAAATTTATGGAGAAAAAG             | 348 |
| D/UW-3/CX   | TCGCCAGTTTTTTCTATGATTTTAACACTATAAATTTATGGAGAAAAAG             | 348 |
| L2 (434/Bu) | TCGCCAGTTTTTTCTATGATTTTAACACTATAAATTTATGGAGAAAAAG             | 348 |
|             | *****                                                         |     |
