# Supplementary material for: A bipartite iron-dependent transcriptional regulation of the tryptophan salvage pathway in Chlamydia trachomatis
Source: eLife journal article supplement (doi:10.7554/elife.42295), 2019-04-02
Supplement: supp [file elife-42295-supp-v1.zip › elife_poa_e42295_Figure_5_Source_data_file_1.xlsx]

## Sheet: Figure 5
Figure 5 Source Data
pCCT-EV		pCCT-lpdA		pCCT-ytgABCD
Condition	Miller	Condition	Miller	Condition	Miller
pET151-EV	318.368	pET151-EV	487.68	pET151-EV	450.338
pET151-EV	728.116	pET151-EV	630.317	pET151-EV	459.88
pET151-YtgR	356.269	pET151-EV	559.744	pET151-EV	723.385
pET151-YtgR	358.632	pET151-YtgR	466.228	pET151-YtgR	167.45
pET151-YtgR	351.489	pET151-YtgR	573.228	pET151-YtgR	261.587
		pET151-YtgR	511.182	pET151-YtgR	119.381
pCCT-trpR		pCCT-trpBA		pCCT-trpBAdOp
Condition	Miller	Condition	Miller	Condition	Miller
pET151-EV	831.382	pET151-EV	624.859	pET151-EV	1578.91
pET151-EV	708.538	pET151-EV	554.847	pET151-EV	775.587
pET151-EV	624.686	pET151-YtgR	258.158	pET151-EV	874.285
pET151-YtgR	613.048	pET151-YtgR	195.415	pET151-YtgR	645.332
pET151-YtgR	717.763	pET151-YtgR	290.91	pET151-YtgR	645.209
pET151-YtgR	792.412			pET151-YtgR	605.109
pCCT-IGR1		pCCT-IGR2		pCCT-IGR3
Condition	Miller	Condition	Miller	Condition	Miller
pET151-EV	1571.34	pET151-EV	945.447	pET151-EV	769.677
pET151-EV	562.562	pET151-EV	753.78	pET151-EV	909.677
pET151-EV	566.88	pET151-EV	763.765	pET151-EV	308.22
pET151-YtgR	369.463	pET151-YtgR	850.43	pET151-YtgR	552.673
pET151-YtgR	568.727	pET151-YtgR	564.889	pET151-YtgR	511.999
pET151-YtgR	232.886	pET151-YtgR	633.581	pET151-YtgR	320.356
ChIP			Bpdl-Treated Millery Assay
Sample	Value		ID	Value
trpR	4.48636		Mock	103.829
trpR	3.9304		Mock	168.121
trpR	9.55227		Mock	113.146
trpBA	29.7157		Bpdl	275.924
trpBA	30.63		Bpdl	223.22
trpBA	16.1432		Bpdl	222.94
dOp	3.20754
dOp	2.94176
dOp	10.4287
dnaB	1.09254
dnaB	1
dnaB	2.37789
