# Supplementary material for: A bipartite iron-dependent transcriptional regulation of the tryptophan salvage pathway in Chlamydia trachomatis
Source: eLife journal article supplement (doi:10.7554/elife.42295), 2019-04-02
Supplement: supp [file elife-42295-supp-v1.zip › elife_poa_e42295_Figure_7_Source_data_file_1.xlsx]

## Sheet: Figure 7
Figure 7 Source Data
5' of YtgR Operator		3' of YtgR Operator		3' of Alt. TSS
Condition	Ratio	Condition	Value	Condition	Value
12 hpi	0.882122	12 hpi	0.423871	12 hpi	0.607758
12 hpi	0.666135	12 hpi	0.402529	12 hpi	0.541024
12 hpi	0.743574	12 hpi	0.500014	12 hpi	0.979816
18 hpi	0.653481	18 hpi	0.422825	18 hpi	1.08752
18 hpi	0.651944	18 hpi	0.424509	18 hpi	1.25023
18 hpi	0.673671	18 hpi	0.425483	18 hpi	0.633397
12 hpi +6h Bpdl	0.679251	12 hpi +6h Bpdl	0.579949	12 hpi +6h Bpdl	2.05509
12 hpi +6h Bpdl	0.745538	12 hpi +6h Bpdl	0.570118	12 hpi +6h Bpdl	2.04694
12 hpi +6h Bpdl	0.717367	12 hpi +6h Bpdl	0.551821	12 hpi +6h Bpdl	1.74801
12 hpi +6h Trp-	0.897064	12 hpi +6h Trp-	0.901541	12 hpi +6h Trp-	0.926611
12 hpi +6h Trp-	1.0483	12 hpi +6h Trp-	0.93103	12 hpi +6h Trp-	0.838781
12 hpi +6h Trp-	0.977306	12 hpi +6h Trp-	0.850868	12 hpi +6h Trp-	1.31575
		3' of YtgR Operator (Alt. Amplicon)
		Condition	Value
		12 hpi	0.471769
		12 hpi	0.405331
		12 hpi	0.460846
		18 hpi	0.531614
		18 hpi	0.489577
		18 hpi	0.521784
		12 hpi +6h Bpdl	0.644143
		12 hpi +6h Bpdl	0.688537
		12 hpi +6h Bpdl	0.710656
		12 hpi +6h Trp-	1.12403
		12 hpi +6h Trp-	1.18811
		12 hpi +6h Trp-	1.07827
pCCT-RT Readthrough				pCCT-RT Miller Assay
Condition	Value			Condition	Value
pET151-EV	0.404095			pET151-EV	190.627
pET151-EV	0.410826			pET151-EV	158.999
pET151-EV	0.465806			pET151-EV	194.719
pET151-YtgR	0.262484			pET151-YtgR	109.87
pET151-YtgR	0.294866			pET151-YtgR	123.069
pET151-YtgR	0.241741			pET151-YtgR	137.829
