# Supplementary material for: A bipartite iron-dependent transcriptional regulation of the tryptophan salvage pathway in Chlamydia trachomatis
Source: eLife journal article supplement (doi:10.7554/elife.42295), 2019-04-02
Supplement: supp [file elife-42295-supp-v1.zip › elife_poa_e42295_Source_code_file_2.pdf]

```
> trpb<-read.csv("finaltrpb.csv")
```

```
#One-Way ANOVA
```

```
> anova(lm(Expression~Condition, data=trpb))
```

```
Analysis of Variance Table
```

```
Response: Expression
```

|           | Df | Sum Sq | Mean Sq | F value | Pr(>F)        |
|-----------|----|--------|---------|---------|---------------|
| Condition | 2  | 5.1456 | 2.57278 | 29.645  | 0.0007761 *** |
| Residuals | 6  | 0.5207 | 0.08679 |         |               |

```
---
```

```
Signif. codes:  0 '***' 0.001 '**' 0.01 '*' 0.05 '.' 0.1 ' ' 1
```

```
#Pair-wise t-test with bonferronis correction for multiple comparisons
```

```
> pairwise.t.test(trpb$Expression, trpb$Condition, p.adj="bonferroni")
```

Pairwise comparisons using t tests with pooled SD

```
data: trpb$Expression and trpb$Condition
```

|      |                 |
|------|-----------------|
| 12UT | 18UT            |
| 18UT | 0.44870 -       |
| 6BPD | 0.00383 0.00098 |
