# Supplementary material for: A bipartite iron-dependent transcriptional regulation of the tryptophan salvage pathway in Chlamydia trachomatis
Source: eLife journal article supplement (doi:10.7554/elife.42295), 2019-04-02
Supplement: supp [file elife-42295-supp-v1.zip › elife_poa_e42295_Source_code_file_3.pdf]

```
> y<-read.csv("trpBA_3.csv")
```

```
#Student's t-test with Welch's correction for unequal variance  
> t.test(Miller~Condition, data=y)
```

Welch Two Sample t-test

data: Miller by Condition

t = 7.6208, df = 2.2332, p-value = 0.01219

alternative hypothesis: true difference in means is not equal to 0

95 percent confidence interval:

166.8512 516.5333

sample estimates:

mean in group pET151-EV mean in group pET151-YtgR

589.8532

248.1609
