# Supplementary material for: A bipartite iron-dependent transcriptional regulation of the tryptophan salvage pathway in Chlamydia trachomatis
Source: eLife journal article supplement (doi:10.7554/elife.42295), 2019-04-02
Supplement: supp [file elife-42295-supp-v1.zip › elife_poa_e42295_Supplementary_file_1.xlsx]

## Sheet: Sheet1
Dataset S1. 5' pRACE Sequencing Collection		Count Value for Independent Biological Replicates			Descriptive Statistics
5'-RACE Product	C. trachomatis L2 (434/Bu) Genome Position	May 11 2017	December 20 2017	January 5 2018	Sum	Percent Representation	Weighted Mean	Variance	SD	Median
1.5 kb	511352		2		2	8	511388	117.638	10.8461	511390
	511389	5	2	2	9	36
	511390	3			3	12
	511391	1			1	4
	511392	3			3	12
	511393	2		4	6	24
	511399	1			1	4
1.1 kb	511765		1		1	4.16667	511878	1053.83	32.4628	511898
	511841	1			1	4.16667
	511850	1		1	2	8.33333
	511858	2			2	8.33333
	511859	1			1	4.16667
	511860	2			2	8.33333
	511870			1	1	4.16667
	511898	4	3	4	11	45.8333
	511901			1	1	4.16667
	511902		1		1	4.16667
	511925		1		1	4.16667
1.0 kb	511988	1		1	2	6.89655	512013	315.384	17.7591	512005
	511990	1			1	3.44828
	512004	1			1	3.44828
	512005	4	5	4	13	44.8276
	512012	1			1	3.44828
	512013	4			4	13.7931
	512020		1		1	3.44828
	512021	1			1	3.44828
	512045	1			1	3.44828
	512047	2			2	6.89655
	512047	1			1	3.44828
	512056		1		1	3.44828

## Sheet: Sheet2
511352
511352
511389
511389
511389
511389
511389
511389
511389
511389
511389
511390
511390
511390
511391
511392
511392
511392
511393
511393
511393
511393
511393
511393
511399
511765
511841
511850
511850
511858
511858
511859
511860
511860
511870
511898
511898
511898
511898
511898
511898
511898
511898
511898
511898
511898
511901
511902
511925
511988
511988
511990
512004
512005
512005
512005
512005
512005
512005
512005
512005
512005
512005
512005
512005
512005
512012
512013
512013
512013
512013
512020
512021
512045
512047
512047
512047
512056
