# Supplementary material for: A bipartite iron-dependent transcriptional regulation of the tryptophan salvage pathway in Chlamydia trachomatis
Source: eLife journal article supplement (doi:10.7554/elife.42295), 2019-04-02
Supplement: supp [file elife-42295-supp-v1.zip › elife_poa_e42295_Supplementary_file_2.xlsx]

## Sheet: Sheet1
Dataset S2. 3' pRACE Sequencing Collection		Count Value for Independent Biological Replicates			Descriptive Statistics
3'-RACE Product	C. trachomatis L2 (434/Bu) Genome Position	May 11 2017	December 20 2017	January 5 2018	Sum	Percent Representation	Weighted Mean	Variance	SD	Median
0.20 kb	511636		1		1	5.55556	511665	102.46	10.1222	511666
	511661	1		1	2	11.1111
	511662	1	1	1	3	16.6667
	511663	2			2	11.1111
	511664	1			1	5.55556
	511667	1	4	1	6	33.3333
	511673			1	1	5.55556
	511676			1	1	5.55556
	511692			1	1	5.55556
0.40 kb	511777		1		1	4.7619	511810	453.896	21.3048	511804
	511778	1			1	4.7619
	511780		1		1	4.7619
	511785		1		1	4.7619
	511792	1			1	4.7619
	511795		1		1	4.7619
	511798	1			1	4.7619
	511800		1		1	4.7619
	511803			1	1	4.7619
	511804	1	1		2	9.52381
	511809	1			1	4.7619
	511816			1	1	4.7619
	511823			1	1	4.7619
	511824		1		1	4.7619
	511830	1			1	4.7619
	511834	1			1	4.7619
	511839	1			1	4.7619
	511840			2	2	9.52381
	511841			1	1	4.7619
0.45 kb	511874		1	1	2	12.5	511889	78.4336	8.85627	511894
	511878	1			1	6.25
	511880		2		2	12.5
	511887	2			2	12.5
	511890		1		1	6.25
	511894			1	1	6.25
	511896	1		1	2	12.5
	511897		2		2	12.5
	511898			2	2	12.5
	511899	1			1	6.25
0.55 kb	511932			1	1	6.66667	511985	325.982	18.055	511989
	511972	1			1	6.66667
	511973			1	1	6.66667
	511975			1	1	6.66667
	511980		1		1	6.66667
	511983		1		1	6.66667
	511989			2	2	13.3333
	511990	1	1		2	13.3333
	511992	1			1	6.66667
	512000	1			1	6.66667
	512004			1	1	6.66667
	512006	1			1	6.66667
	512007		1		1	6.66667

## Sheet: Sheet2
511636	511777	511874	511932
511661	511778	511878	511972
511661	511780	511880	511973
511662	511785	511880	511975
511662	511792	511887	511980
511662	511795	511887	511983
511663	511798	511890	511989
511663	511800	511894	511989
511664	511803	511896	511990
511667	511804	511896	511990
511667	511804	511897	511992
511667	511809	511897	512000
511667	511816	511898	512004
511667	511823	511898	512006
511667	511824	511899	512007
511673	511830
511676	511834
511692	511839
	511840
	511840
	511841
