# Supplementary material for: A bipartite iron-dependent transcriptional regulation of the tryptophan salvage pathway in Chlamydia trachomatis
Source: eLife journal article supplement (doi:10.7554/elife.42295), 2019-04-02
Supplement: supp [file elife-42295-supp-v1.zip › elife_poa_e42295_Supplementary_file_5.xlsx]

## Sheet: Sheet1
Supplementary File 5. Oligonucleotide primers used in this study
Primer ID	Nucleotide Sequence (5' to 3')	Application	Figure	Reference
qtrpR_Fwd	CGAACGTAAAGATGTCGCTTC	RT-qPCR	Fig. 3B-C; Fig. 4B; Fig. 7B	This study
qtrpR_Rev	AAGGGCATTAGATCCTCTGGTAA	RT-qPCR	Fig. 3B-C; Fig. 4B; Fig. 7B	This study
qtrpB_Fwd	GAGGTGGCTCCAACGCTATTG	RT-qPCR	Fig. 3B-C; Fig. 4B	Brinkworth et al., 2018
qtrpB_Rev	TCCAGCGGAAATGGAGTGAG	RT-qPCR	Fig. 3B-C; Fig. 4B	Brinkworth et al., 2018
qtrpA_Fwd	AGCTCTGATTCAAGGAGGTGTTG	RT-qPCR	Fig. 3B-C	Brinkworth et al., 2018
qtrpA_Rev	AGTCCCTTTGTAGAAGCGGATTG	RT-qPCR	Fig. 3B-C	Brinkworth et al., 2018
qdnaB_Fwd	TGTGCTGGGGTGTATGTTGACCA	RT-qPCR	Fig. 2D	This study
qdnaB_Rev	ATGGGGCGGTCAGACTTGA	RT-qPCR	Fig. 2D	This study
qeuo_Fwd	GCTGTTCCTGTTACTTCGCAAA	RT-qPCR	Fig. 1C	Thompson & Carabeo, 2011
qeuo_Rev	AACATAGATAGCCTGACGAGTCACA	RT-qPCR	Fig. 1C	Thompson & Carabeo, 2011
qomcB_Fwd	CCAAAGCGAAAGACAACACTTCT	RT-qPCR	Fig. 1D	Thompson & Carabeo, 2011
qomcB_Rev	AACCGGAGCAACCTCTTTACG	RT-qPCR	Fig. 1D	Thompson & Carabeo, 2011
qytgA_Fwd	CTCTTGTGTTTAGCAGGCTGTTTC	RT-qPCR	Fig. 2A	Thompson & Carabeo, 2011
qytgA_Rev	TGCGATTCATAGACAAGACATAGATG	RT-qPCR	Fig. 2A	Thompson & Carabeo, 2011
qahpC_Fwd	CCAGTTAGCTGGACAAACCATTCCG	RT-qPCR; qPCR	Fig. 2B	Thompson & Carabeo, 2011
qahpC_Rev	CGTTCCATTGACGAGGAATTGCGT	RT-qPCR; qPCR	Fig. 2B	Thompson & Carabeo, 2011
qdevB_Fwd	ACGAAGATGTAGAAGCTGGAAGTA	RT-qPCR	Fig. 2C	Thompson & Carabeo, 2011
qdevB_Rev	TGCGGTATCCATACGAAAGATTTG	RT-qPCR	Fig. 2C	Thompson & Carabeo, 2011
pCCT_trpR_Fwd	CTATCTTGGTACCCGTTCTTGGGTAGAGCA	Cloning	Fig. 5C	This study
pCCT_trpR_Rev	GAAGATGGTACCCCAGCCAGACTCCTC	Cloning	Fig. 5C	This study
pCCT_trpBA_Fwd	CTATCTTGGTACCTCTGTTTTAGCAGTTTTGGTACG	Cloning	Fig. 5C	This study
pCCT_trpBA_Rev	GAAGATGGTACCGATTCTGTATAGGGGCTAATAGTTC	Cloning	Fig. 5C	This study
pCCT_trpBAΔOperator_Fwd_1	GCATGCCATGCACGGCGGCGCGGCAAGCTGATTGCTTCCAAGATATTCAAAAATTCATCCTCTTACAGCGTGCCTGG	Cloning	Fig. 5C	This study
pCCT_trpBAΔOperator_Rev_1	CTTCTGAGTTCGGCATGGGGTCAGG	Cloning	Fig. 5C	This study
pCCT_trpBAΔOperator_Fwd_2	CCTGACCCCATGCCGAACTCAGAAG	Cloning	Fig. 5C	This study
pCCT_trpBAΔOperator_Rev_2	TGGAAGCAATCAGCTTGCCGCGCCGCCGTGCATGGCATGCTGCAGCTATACTTACGTACCAAAACTGCTAAAACAGAGGT	Cloning	Fig. 5C	This study
pCCT_IGR1_Fwd	CTATCTTGGTACCTGCCCTTAAAGGATCAGATCC	Cloning	Fig. S4	This study
pCCT_IGR1_Rev	GAAGATGGTACCGAGGATGAATTTTTGAATATCTTGG	Cloning	Fig. S4	This study
pCCT_IGR2_Fwd	CTATCTTGGTACCTGCCATGCAAATCAGCTT	Cloning	Fig. S4	This study
pCCT_IGR2_Rev	GAAGATGGTACCGCTCTTACTTCTATAAGAACATCTC	Cloning	Fig. S4	This study
pCCT_IGR3_Fwd	CTATCTTGGTACCCCTCTTACAGCGTGCCT	Cloning	Fig. S4	This study
pCCT_IGR3_Rev	GAAGATGGTACCGGCTAATAGTTCTTCGGGAAGG	Cloning	Fig. S4	This study
pCCT_dnaB_Fwd	CTTCTAGGTACCCACTCAGTCATCTTTCCAATGA	Cloning	Fig. 5B	This study
pCCT_dnaB_Rev	CACGAAGGTACCACATACACCCCAGCACAATCA	Cloning	Fig. 5B	This study
pCCT_RT_Fwd	GAGGAGGGTACCGAGGAGTCTGGCTGGCAAGC	Cloning	Fig. 7C-E	This study
pCCT_RT_Rev	CATCGGGGTACCGGCTAATAGTTCTTCGGGAAGGAACG	Cloning	Fig. 7C-E	This study
RACE_trpB_GSP	GATTACGCCAAGCTTAGCTCGTAACGCCTCTTCATCGGTGGCT	5'-RACE	Fig. 4A	This study
RACE_trpB_nGSP	GATTACGCCAAGCTTCGTGGAATACTCCAGGTCGCCCTGTTGC	5'-RACE	Fig. 4A	This study
RACE_trpR_GSP	GATTACGCCAAGCTTCAAGAGGAGTCTGGCTGGCAAGCTTTTCTGACATT	3'-RACE	Fig. 6B	This study
RACE_trpR_nGSP	GATTACGCCAAGCTTGGCGAACGTAAAGATGTCGCTTCTCGCT	3-'RACE	Fig. 6B	This study
3'RACE_5'_Fwd	CCCTTAAAGGATCAGATCCTCAAT	RT-qPCR	Fig. 7B	This study
3'RACE_5'_Rev	AACAGAATATTTGTTCATTAACAACGC	RT-qPCR	Fig. 7B	This study
3'RACE_3'_Rev	TGCAGCATGCCATGCAAATCAG	RT-qPCR	Fig. 7B	This study
3'RACE_3'_Rev	GCCAGGCACGCTGTAAGAG	RT-qPCR	Fig. 7B	This study
3'RACE_trpA_Fwd	CATGTGCTGAATTATTCAGATGGTTTCA	RT-qPCR	Fig. 7B	This study
3'RACE_trpA_Rev	CCAGGAATAACTGTTTGTGCAAGTG	RT-qPCR	Fig. 7B	This study
RT_trpRBA_Fwd	ATGAAAAATCAAGAGGAGTCTGGC	RT-PCR	Fig. 6B	This study
RT_trpRBA_Rev	TTATCCAGGAATAACTGTTTGTGCAAGTGC	RT-PCR	Fig. 6B	This study
ChIP_PtrpBA_Fwd	GCAGGATTATTCTGTCGCCA	ChIP-qPCR	Fig. 5E	This study
ChIP_PtrpBA_Rev	GGAAGGAACGCTCCCC	ChIP-qPCR	Fig. 5E	This study
ChIP_PtrpR_Fwd	GATCCTTATTCCTGGAGGGGA	ChIP-qPCR	Fig. 5E	This study
ChIP_PtrpR_Rev	TCTTGATTTTTCATATCGCACCTTT	ChIP-qPCR	Fig. 5E	This study
ChIP_PdnaB_Fwd	GCATAAGAGTCAGAATCCTTGCTTCCT	ChIP-qPCR	Fig. 5E	This study
ChIP_PdnaB_Rev	GTCTGGGTCGCCATAGTTAGAGG	ChIP-qPCR	Fig. 5E	This study
ChIP_AmpR_Fwd	CGGATGGCATGACAGTAAGA	ChIP-qPCR	Fig. 5E	This study
ChIP_AmpR_Rev	TCCGATCGTTGTCAGAAGTAAG	ChIP-qPCR	Fig. 5E	This study
