# Supplementary material for: A bipartite iron-dependent transcriptional regulation of the tryptophan salvage pathway in Chlamydia trachomatis
Source: eLife journal article supplement (doi:10.7554/elife.42295), 2019-04-02
Supplement: supp [file elife-42295-supp-v1.zip › elife_poa_e42295_Supplementary_file_6.xlsx]

## Sheet: Sheet1
Supplementary File 6. Plasmids used in this study
Plasmid	Relevant Details	Application	Figure	Source/Reference
pCCT-EV	LacZ reporter plasmid with arabinose inducible araBAD promoter with KpnI RE site between the promoter and lacZ CDS	Two-plasmid Assay	Fig. 5B	Thompson et al., 2012
pCCT-lpdA	pCCT-EV with the intergenic region upstream of lpdA inserted at the KpnI RE site	Two-plasmid Assay	Fig. 5B	This Study
pCCT-ytgABCD	pCCT-EV with the intergenic region upstream of ytgABCD inserted at the KpnI RE site	Two-plasmid Assay	Fig. 5B	Thompson et al., 2012
pCCT-trpR	pCCT-EV with the intergenic region upstream of tpR inserted at the KpnI RE site	Two-plasmid Assay	Fig. 5C	This Study
pCCT-trpBA	pCCT-EV with the intergenic region upstream of trpBA inserted at the KpnI RE site	Two-plasmid Assay	Fig. 5C	This Study
pCCT-trpBAΔOperator	pCCT-trpBA with a modified putative YtgR operator sequence	Two-plasmid Assay	Fig. 5C	This Study
pCCT-trpBA-IGR1	pCCT-EV with the 5'-end of the trpRBA IGR containing the YtgR operator inserted at the KpnI RE site	Two-plasmid Assay	Fig. S4	This Study
pCCT-trpBA-IGR2	pCCT-EV with the central region of the trpRBA IGR containing the YtgR operator inserted at the KpnI RE site	Two-plasmid Assay	Fig. S4	This Study
pCCT-trpBA-IGR3	pCCT-EV with the 3'-end of the trpRBA IGR not containing the YtgR operator inserted at the KpnI RE site	Two-plasmid Assay	Fig. S4	This Study
pET151-EV	Circularized empty vector	Two-plasmid Assay	Fig. 5; Fig. S4	Thompson et al., 2012
pET151-YtgR	Expression of the YtgR domain with an N-terminal 6xHis and V5 tag	Two-plasmid Assay	Fig. 5; Fig. S4	Thompson et al., 2012
pRACE	Sequencing vector for RACE products	RACE Sequencing	Fig. 4; Fig. 6; Fig. S3; Fig. S6	Takara Bio
pCCT-RT (Readthrough)	pCCT-EV with the trpR ORF, IGR and first 19 amino acids of trpB inserted at the KpnI RE site	Two-plasmid Assay	Fig.7D-E	This Study
