# Supplementary figures and images for: A bipartite iron-dependent transcriptional regulation of the tryptophan salvage pathway in Chlamydia trachomatis
Source: eLife journal article supplement (doi:10.7554/elife.42295), 2019-04-02

**A**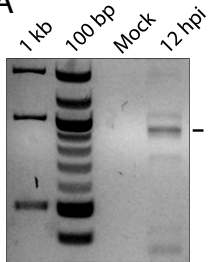

– 1.0 kb 1.5 kb –

**B**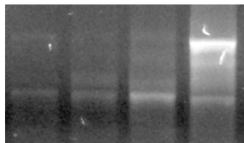

Supplement: supp [file elife-42295-supp-v1.zip › elife_poa_e42295_Figure_4_figure_supplement_1.pdf]

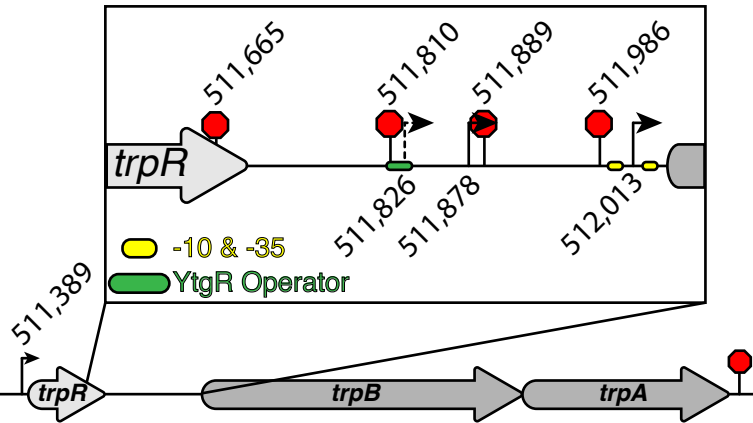

Supplement: supp [file elife-42295-supp-v1.zip › elife_poa_e42295_Figure_8_figure_supplement_1.pdf]

# RPKM Fold Change

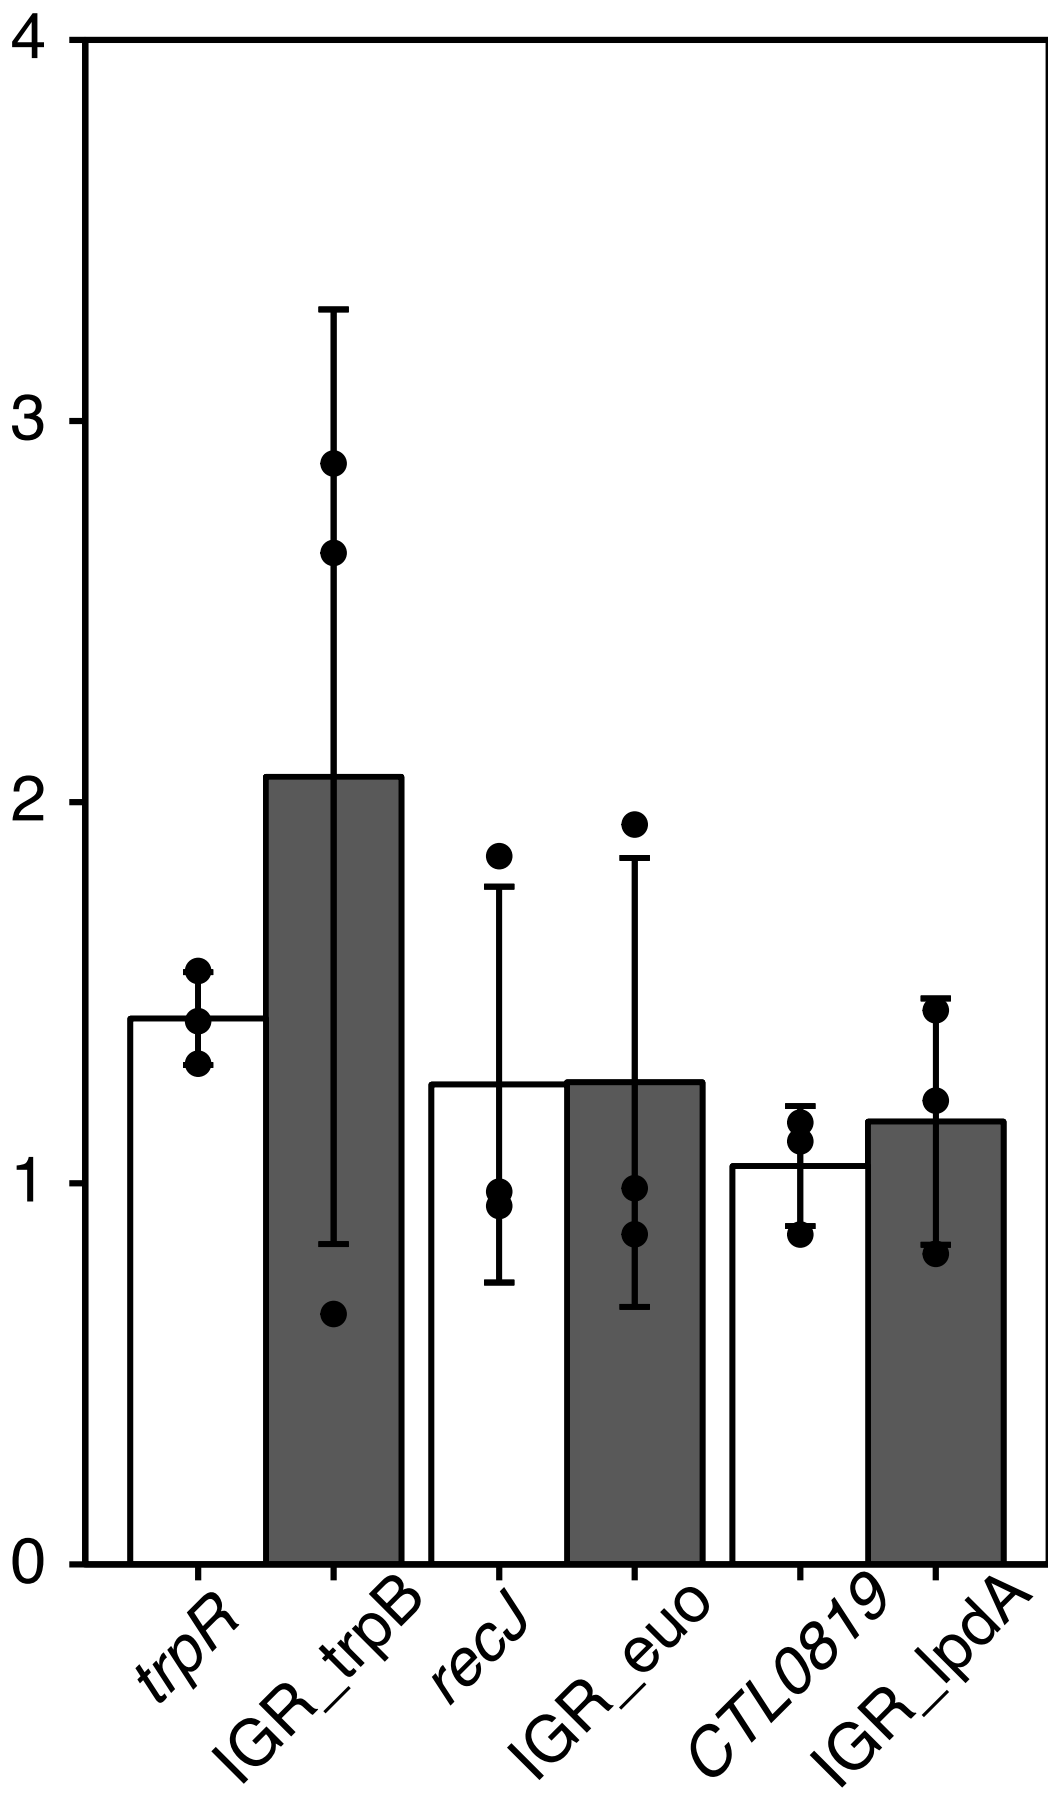

Supplement: supp [file elife-42295-supp-v1.zip › elife_poa_e42295_Figure_6_figure_supplement_2.pdf]

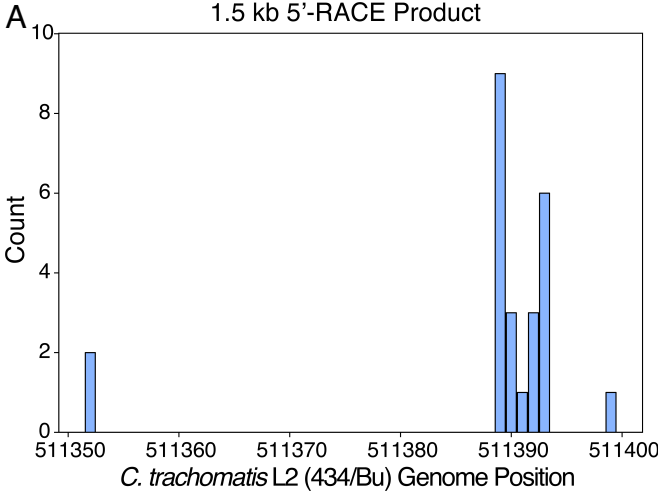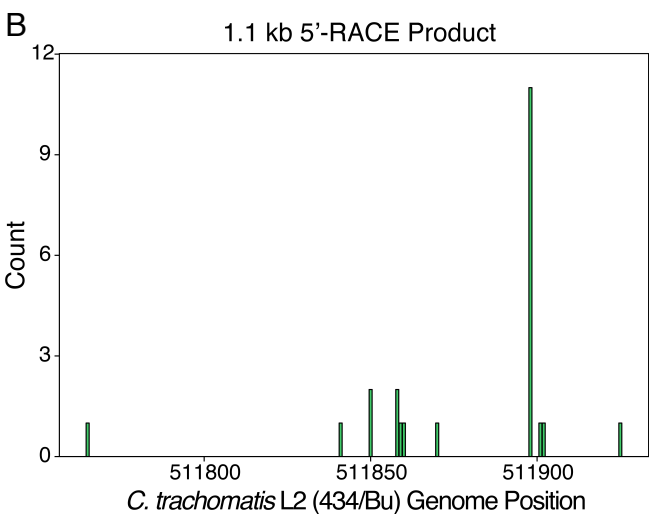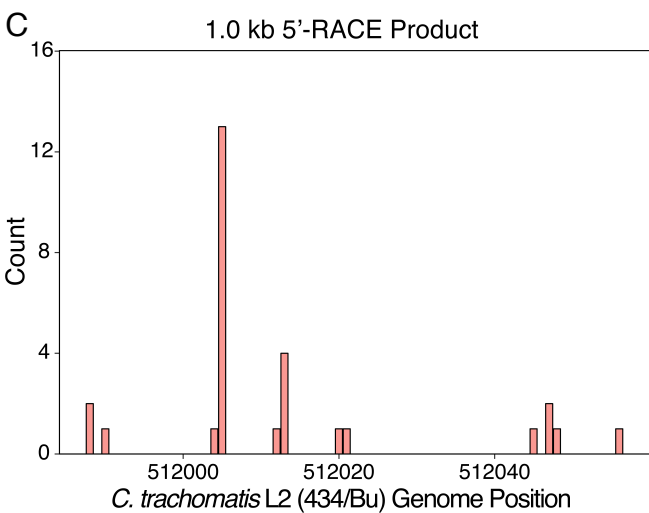

Supplement: supp [file elife-42295-supp-v1.zip › elife_poa_e42295_Figure_4_figure_supplement_2.pdf]

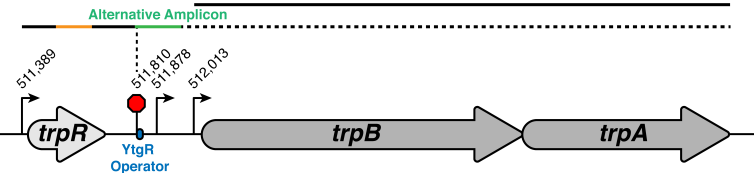

3' of YtgR Operator  
Alternate Amplicon

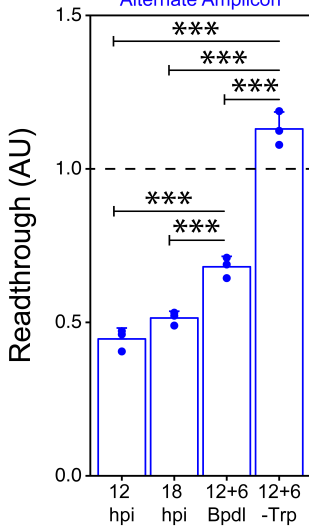

Supplement: supp [file elife-42295-supp-v1.zip › elife_poa_e42295_Figure_7_figure_supplement_1.pdf]

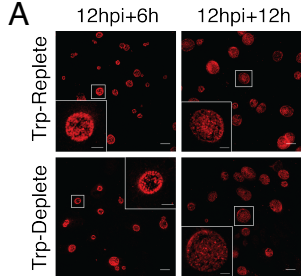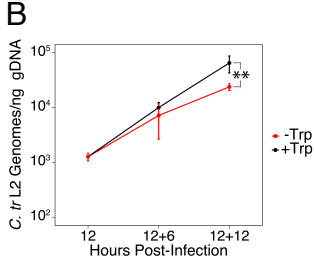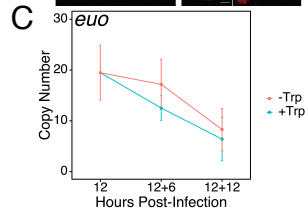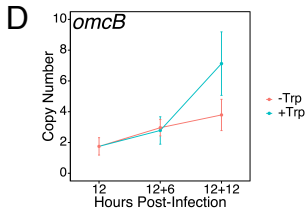

Supplement: supp [file elife-42295-supp-v1.zip › elife_poa_e42295_Figure_1_figure_supplement_1.pdf]

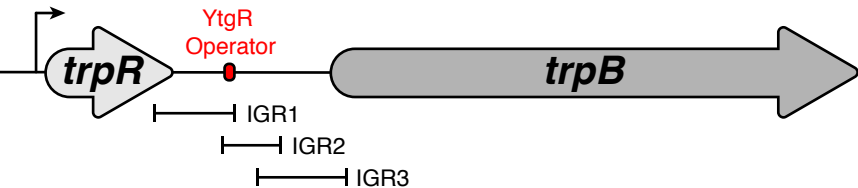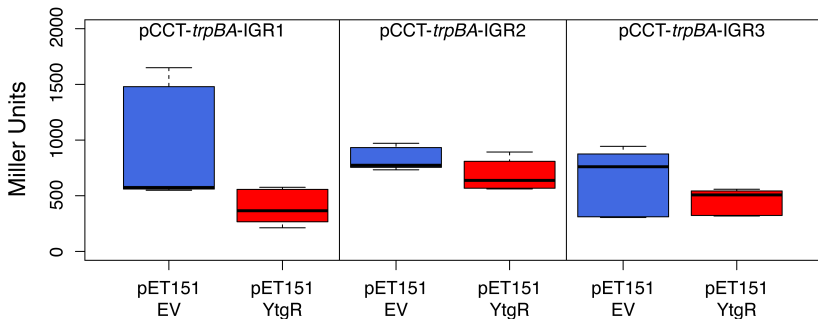

Supplement: supp [file elife-42295-supp-v1.zip › elife_poa_e42295_Figure_5_figure_supplement_2.pdf]

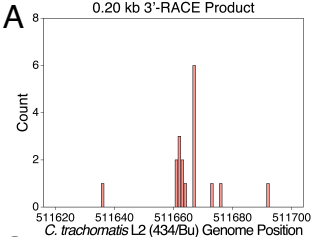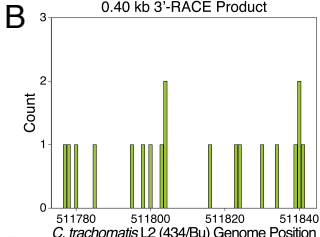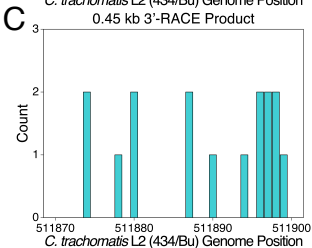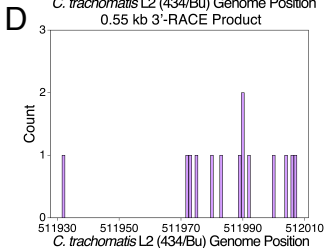

Supplement: supp [file elife-42295-supp-v1.zip › elife_poa_e42295_Figure_6_figure_supplement_4.pdf]

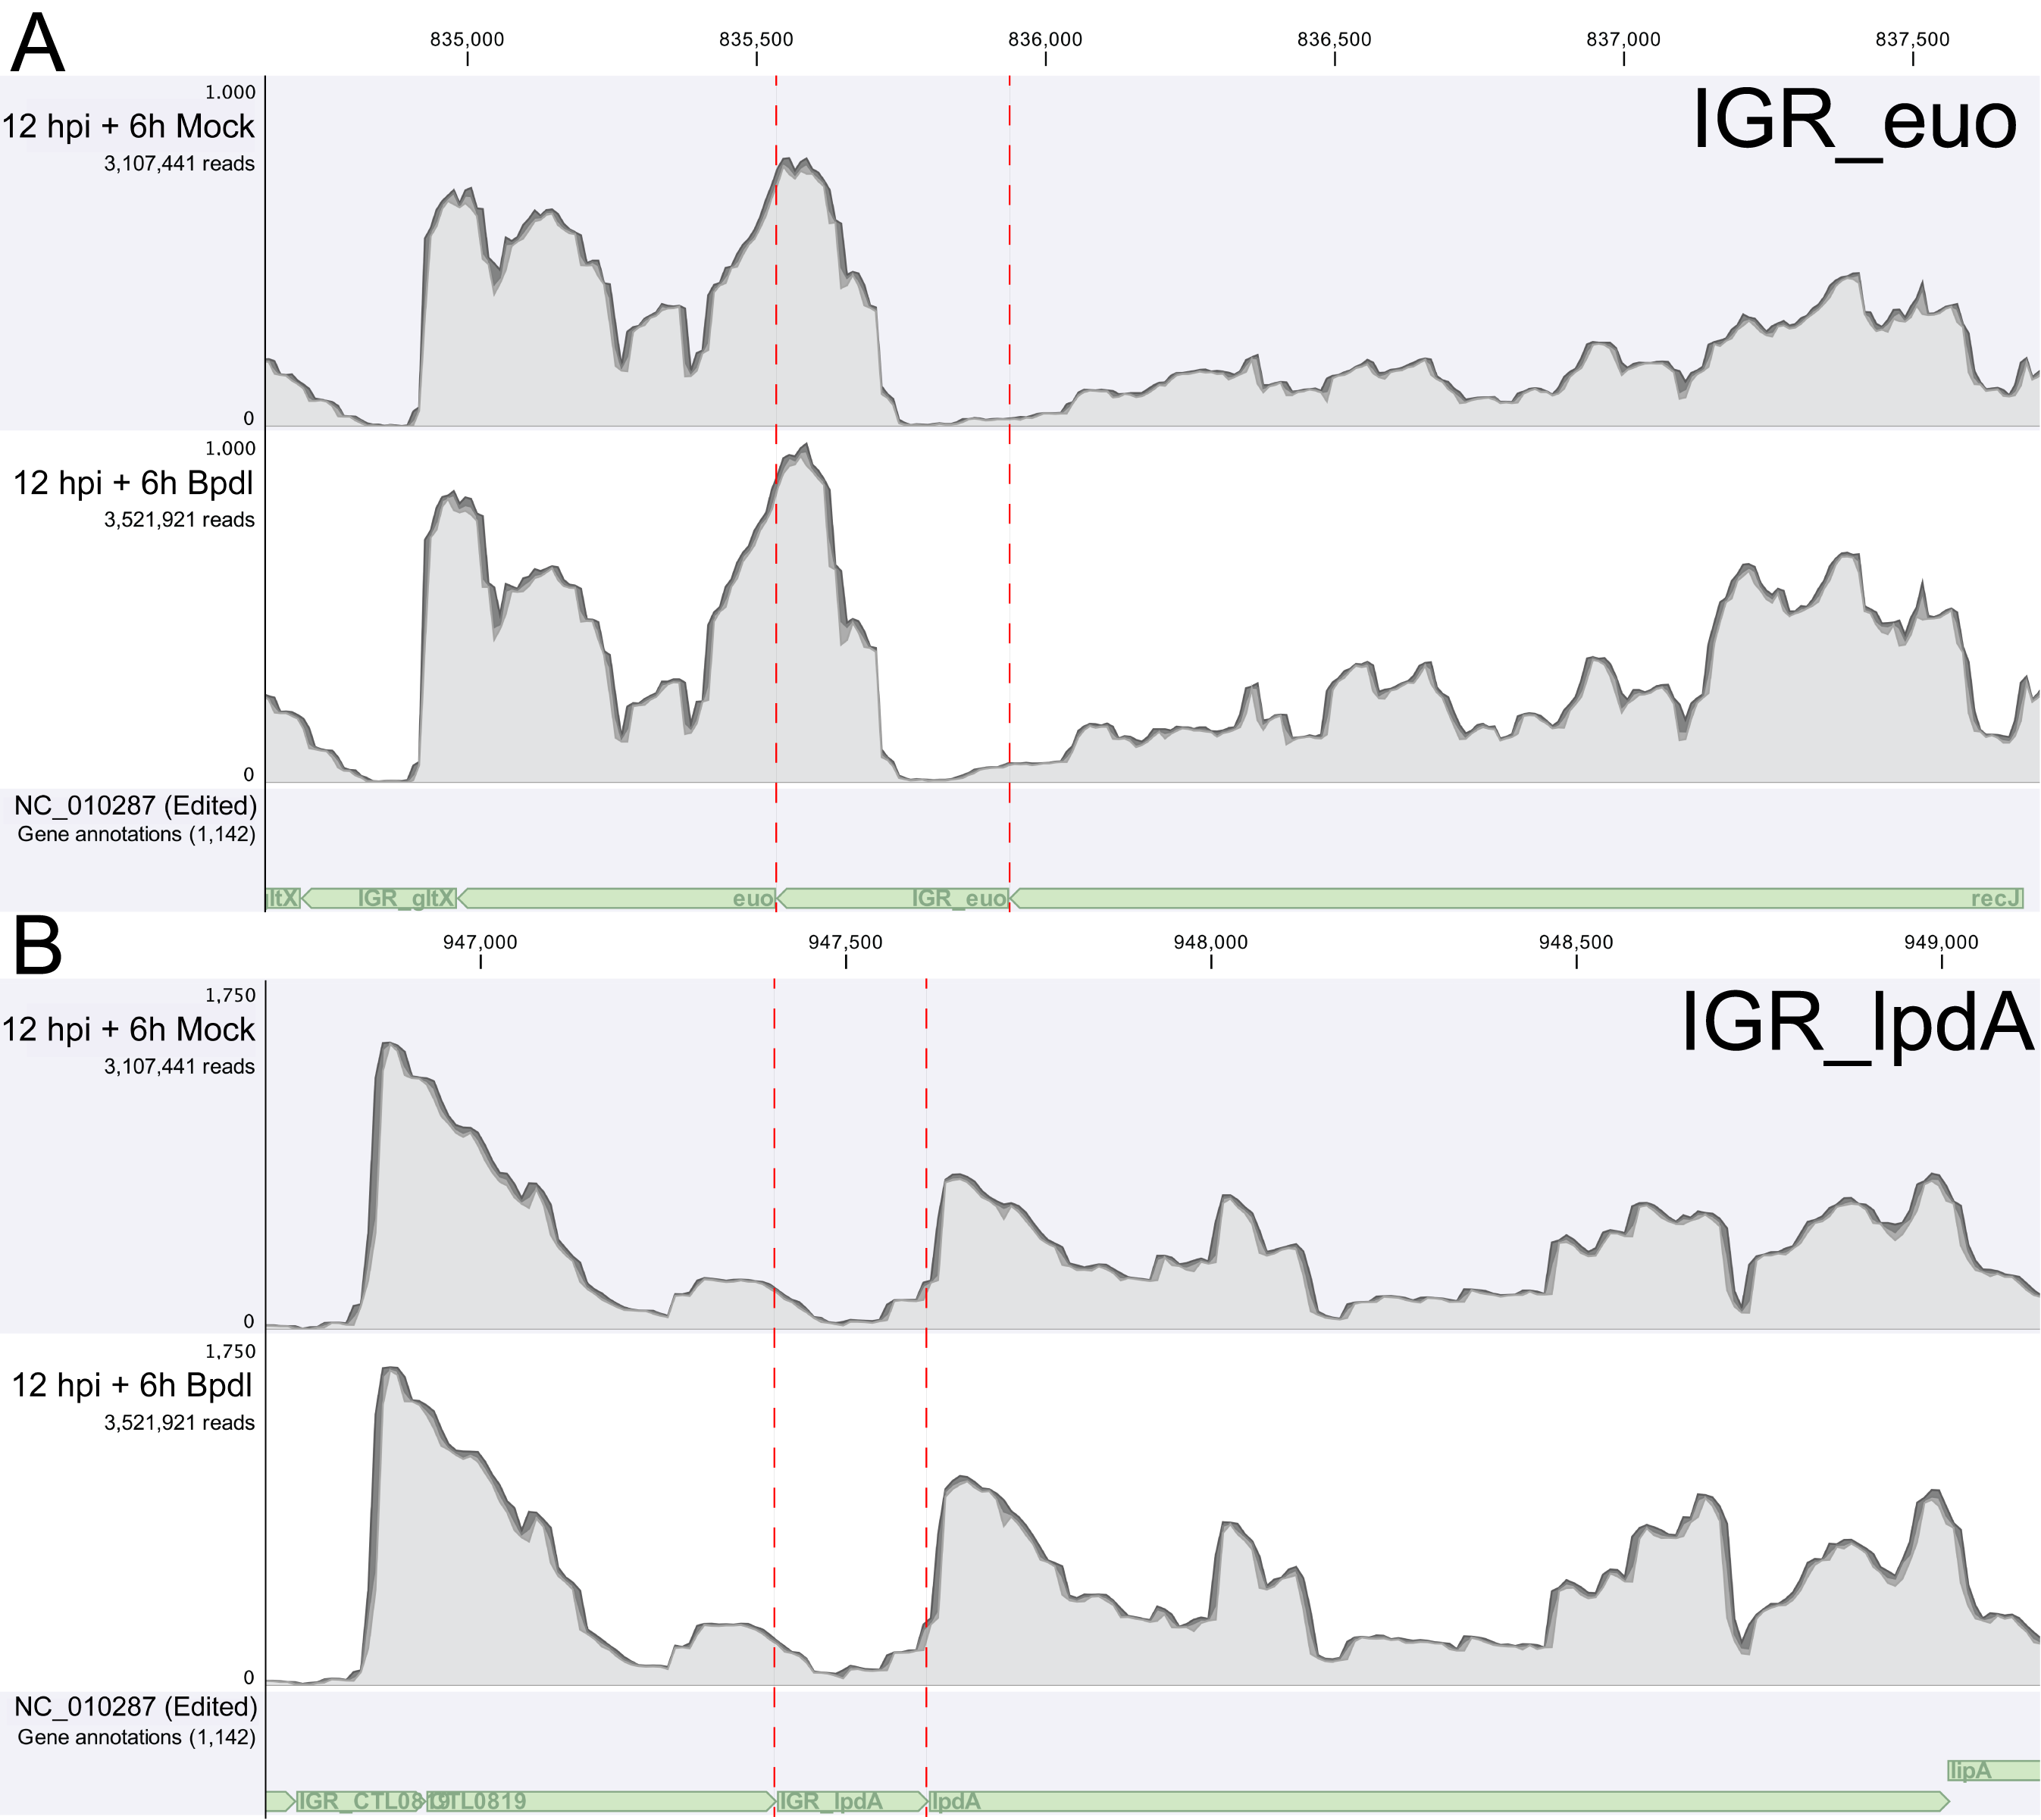

Supplement: supp [file elife-42295-supp-v1.zip › elife_poa_e42295_Figure_6_figure_supplement_1.tif]

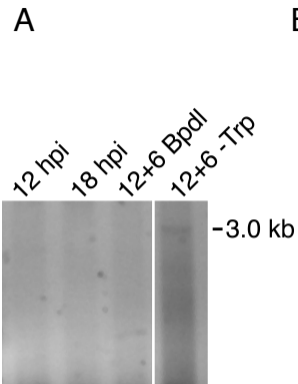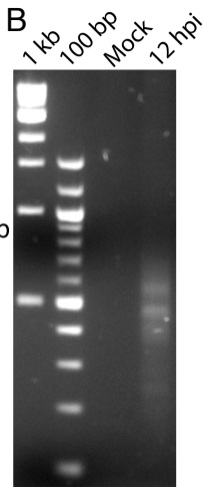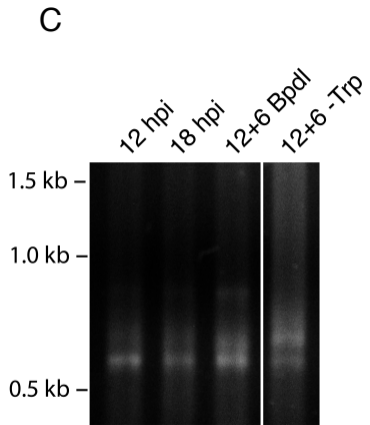

Supplement: supp [file elife-42295-supp-v1.zip › elife_poa_e42295_Figure_6_figure_supplement_3.pdf]
